# Supplementary material
Source: publisher site journal article supplement (https://www.spandidos-publications.com/2644/downloadSupplementary)
Supplement: Supplementary file 1 [file downloadSupplementary]

Table SI. Alleles of 16 short tandem repeat loci in PE8 cell line.

| Marker  | Allele 1 | Allele 2 |
|---------|----------|----------|
| D8S1179 | 11       | 13       |
| D21S11  | 29       | 29       |
| D7S820  | 11       | 11       |
| CSF1PO  | 11       | 12       |
| D3S1358 | 18       | 18       |
| TH01    | 9        | 9        |
| D13S317 | 11       | 13       |
| D16S539 | 12       | 13       |
| D2S1338 | 17       | 20       |
| D19S433 | 13       | 13       |
| vWA     | 14       | 18       |
| TPOX    | 8        | 10       |
| D18S51  | 10       | 12       |
| AMEL    | X        | Y        |
| D5S818  | 11       | 13       |
| FGA     | 24       | 24       |

Table SII. Alleles of 16 short tandem repeat loci in PE9 cell line.

| Marker  | Allele 1 | Allele 2 |
|---------|----------|----------|
| D8S1179 | 9        | 17       |
| D21S11  | 30       | 31       |
| D7S820  | 10       | 10       |
| CSF1PO  | 11       | 12       |
| D3S1358 | 15       | 18       |
| TH01    | 6        | 9        |
| D13S317 | 8        | 8        |
| D16S539 | 9        | 9        |
| D2S1338 | 17       | 25       |
| D19S433 | 13       | 14       |
| vWA     | 16       | 17       |
| TPOX    | 8        | 8        |
| D18S51  | 14       | 14       |
| AMEL    | X        | Y        |
| D5S818  | 11       | 12       |
| FGA     | 23       | 25       |

Table SIII. CI values obtained from the different combinations of treatments with APR-246 and DZ-Nep.

| A, GOS-3 cells     |        |                     |          |                  |          |                  |           |
|--------------------|--------|---------------------|----------|------------------|----------|------------------|-----------|
| Dose, mM           |        | Combined treatments |          | Pretreatments    |          |                  |           |
|                    |        | APR+DZ-Nep          |          | PREAPR+DZ-Nep48H |          | PREDZ-Nep+APR48H |           |
| APR-246            | DZ-Nep | Fa                  | CI value | Fa               | CI value | Fa               | CI value  |
| 62                 | 5      | 0.843               | 1.021    | 0.840            | 0.931    | 0.770            | 1.132     |
| 66                 | 10     | 0.884               | 0.951    | 0.827            | 0.986    | 0.817            | 1.058     |
| 70                 | 20     | 0.885               | 1.006    | 0.865            | 0.956    | 0.832            | 1.074     |
| 74                 | 40     | 0.890               | 1.042    | 0.882            | 0.964    | 0.853            | 1.056     |
| 78                 | 80     | 0.893               | 1.085    | 0.884            | 1.009    | 0.854            | 1.110     |
| B, MOG-G-CCM cells |        |                     |          |                  |          |                  |           |
| Dose, mM           |        | Combined treatments |          | Pretreatments    |          |                  |           |
|                    |        | APR+DZ-Nep          |          | PREAPR+DZ-Nep48H |          | PREDZ-Nep+APR48H |           |
| APR-246            | DZ-Nep | Fa                  | CI value | Fa               | CI value | Fa               | CI value  |
| 33                 | 5      | 0.834               | 0.840    | 0.010            | 194.110  | 0.000            | 20120000  |
| 35                 | 10     | 0.871               | 0.872    | 0.052            | 6.069    | 0.001            | 92862.200 |
| 37                 | 20     | 0.926               | 0.882    | 0.188            | 1.208    | 0.002            | 63703.500 |
| 39                 | 40     | 0.940               | 0.915    | 0.473            | 0.589    | 0.010            | 840.722   |
| 41                 | 80     | 0.944               | 0.956    | 0.769            | 0.335    | 0.011            | 23.153    |
| C, U87MG cells     |        |                     |          |                  |          |                  |           |
| Dose, mM           |        | Combined treatments |          | Pretreatments    |          |                  |           |
|                    |        | APR+DZ-Nep          |          | PREAPR+DZ-Nep48H |          | PREDZ-Nep+APR48H |           |
| APR-246            | DZ-Nep | Fa                  | CI value | Fa               | CI value | Fa               | CI value  |
| 33                 | 5      | 0.271               | 1.061    | 0.245            | 1.221    | 0.000            | 6957.970  |
| 35                 | 10     | 0.371               | 1.063    | 0.265            | 1.267    | 0.001            | 443.598   |
| 37                 | 20     | 0.452               | 1.087    | 0.306            | 1.175    | 0.002            | 482.054   |
| 39                 | 40     | 0.555               | 1.093    | 0.403            | 1.050    | 0.011            | 57.024    |
| 41                 | 80     | 0.859               | 0.902    | 0.427            | 1.090    | 0.051            | 10.526    |
| D, LN405 cells     |        |                     |          |                  |          |                  |           |

| Dose, mM            |        | Combined treatments |          | Pretreatments    |          |                  |          |
|---------------------|--------|---------------------|----------|------------------|----------|------------------|----------|
|                     |        | APR+DZ-Nep          |          | PREAPR+DZ-Nep48H |          | PREDZ-Nep+APR48H |          |
| APR-246             | DZ-Nep | Fa                  | CI value | Fa               | CI value | Fa               | CI value |
| 70                  | 5      | 0.628               | 0.963    | 0.052            | 12.490   | 0.216            | 1.136    |
| 74                  | 10     | 0.677               | 0.975    | 0.165            | 1.215    | 0.225            | 1.194    |
| 78                  | 20     | 0.742               | 0.965    | 0.217            | 1.122    | 0.242            | 1.231    |
| 82                  | 40     | 0.815               | 0.931    | 0.235            | 1.226    | 0.322            | 1.116    |
| 86                  | 80     | 0.818               | 0.974    | 0.252            | 1.370    | 0.377            | 1.080    |
| E, LN405-TMZR cells |        |                     |          |                  |          |                  |          |
| Dose, mM            |        | Combined treatments |          | Pretreatments    |          |                  |          |
|                     |        | APR+DZ-Nep          |          | PREAPR+DZ-Nep48H |          | PREDZ-Nep+APR48H |          |
| APR-246             | DZ-Nep | Fa                  | CI value | Fa               | CI value | Fa               | CI value |
| 62                  | 5      | 0.662               | 1.014    | 0.199            | 4.000    | 0.243            | 1.520    |
| 66                  | 10     | 0.722               | 1.044    | 0.199            | 7.041    | 0.244            | 2.092    |
| 70                  | 20     | 0.753               | 1.091    | 0.237            | 4.464    | 0.293            | 1.194    |
| 74                  | 40     | 0.781               | 1.140    | 0.311            | 1.757    | 0.318            | 1.124    |
| 78                  | 80     | 0.795               | 1.205    | 0.365            | 1.293    | 0.321            | 1.303    |

APR-246+DZ-Nep, double treatment with APR-246 and DZ-Nep for 72 h; PREAPR-246+DZ-Nep48H, pretreatment of APR-246 for 24 h followed by post-treatment with DZ-Nep for 48 h; PREDZ-Nep+APR-24648H, pretreatment of DZ-Nep for 24 h followed by post-treatment with APR-246 for 48 h; CI, Combinational Index; Fa: fractions affected.

Table SIV. CI values obtained from the different combinations of treatments with APR-246 and panobinostat.

| A, GOS-3 cells     |       |                     |          |                 |          |                 |          |
|--------------------|-------|---------------------|----------|-----------------|----------|-----------------|----------|
| Dose, mM           |       | Combined treatments |          | Pretreatments   |          |                 |          |
|                    |       | APR+Panob           |          | PREAPR+Panob48H |          | PREPanob+APR48H |          |
| APR-246            | Panob | Fa                  | CI value | Fa              | CI value | Fa              | CI value |
| 62                 | 0.01  | 0.862               | 0.965    | 0.811           | 0.967    | 0.802           | 1.040    |
| 66                 | 0.02  | 0.867               | 1.010    | 0.829           | 0.999    | 0.858           | 0.927    |
| 70                 | 0.04  | 0.889               | 0.988    | 0.859           | 0.998    | 0.868           | 0.947    |
| 74                 | 0.08  | 0.910               | 0.957    | 0.871           | 1.044    | 0.877           | 0.968    |
| 78                 | 0.16  | 0.915               | 0.986    | 0.908           | 1.002    | 0.886           | 0.982    |
| B, MOG-G-CCM cells |       |                     |          |                 |          |                 |          |
| Dose, mM           |       | Combined treatments |          | Pretreatments   |          |                 |          |
|                    |       | APR+Panob           |          | PREAPR+Panob48H |          | PREPanob+APR48H |          |
| APR-246            | Panob | Fa                  | CI value | Fa              | CI value | Fa              | CI value |
| 33                 | 0.01  | 0.823               | 0.905    | 0.010           | 58.722   | 0.081           | 2.659    |
| 35                 | 0.02  | 0.871               | 0.966    | 0.294           | 1.158    | 0.153           | 2.170    |
| 37                 | 0.04  | 0.926               | 1.002    | 0.423           | 0.967    | 0.281           | 1.761    |
| 39                 | 0.08  | 0.940               | 1.167    | 0.479           | 1.093    | 0.914           | 0.794    |
| 41                 | 0.16  | 0.949               | 1.270    | 0.802           | 0.421    | 0.938           | 0.804    |
| C, U87MG cells     |       |                     |          |                 |          |                 |          |
| Dose, mM           |       | Combined treatments |          | Pretreatments   |          |                 |          |
|                    |       | APR+Panob           |          | PREAPR+Panob48H |          | PREPanob+APR48H |          |
| APR-246            | Panob | Fa                  | CI value | Fa              | CI value | Fa              | CI value |
| 33                 | 0.01  | 0.891               | 0.693    | 0.342           | 1.190    | 0.081           | 243.190  |
| 35                 | 0.02  | 0.912               | 0.713    | 0.358           | 1.335    | 0.153           | 36.338   |
| 37                 | 0.04  | 0.920               | 0.748    | 0.549           | 0.914    | 0.281           | 4.952    |
| 39                 | 0.08  | 0.955               | 0.725    | 0.618           | 0.920    | 0.914           | 0.216    |

|                     |        |                     |          |                 |          |                 |          |
|---------------------|--------|---------------------|----------|-----------------|----------|-----------------|----------|
| 41                  | 0.16   | 0.966               | 0.737    | 0.729           | 0.897    | 0.938           | 0.202    |
| D, LN405 cells      |        |                     |          |                 |          |                 |          |
| Dose, mM            |        | Combined treatments |          | Pretreatments   |          |                 |          |
|                     |        | APR+Panob           |          | PREAPR+Panob48H |          | PREPanob+APR48H |          |
| APR-246             | Panob. | Fa                  | CI value | Fa              | CI value | Fa              | CI value |
| 70                  | 0.01   | 0.712               | 0.969    | 0.025           | 1.532    | 0.298           | 0.993    |
| 74                  | 0.02   | 0.719               | 1.087    | 0.057           | 1.583    | 0.346           | 0.985    |
| 78                  | 0.04   | 0.726               | 1.279    | 0.152           | 1.549    | 0.552           | 0.784    |
| 82                  | 0.08   | 0.783               | 1.498    | 0.339           | 1.546    | 0.650           | 0.724    |
| 86                  | 0.16   | 0.841               | 1.851    | 0.690           | 1.375    | 0.784           | 0.611    |
| E, LN405-TMZR cells |        |                     |          |                 |          |                 |          |
| Dose, mM            |        | Combined treatments |          | Pretreatments   |          |                 |          |
|                     |        | APR+Panob           |          | PREAPR+Panob48H |          | PREPanob+APR48H |          |
| APR-246             | Panob  | Fa                  | CI value | Fa              | CI value | Fa              | CI value |
| 62                  | 0.01   | 0.323               | 1.347    | 0.138           | 1.590    | 0.182           | 1.521    |
| 66                  | 0.02   | 0.424               | 1.401    | 0.194           | 1.467    | 0.208           | 1.563    |
| 70                  | 0.04   | 0.823               | 1.076    | 0.340           | 1.033    | 0.403           | 0.794    |
| 74                  | 0.08   | 0.859               | 1.127    | 0.508           | 0.765    | 0.528           | 0.640    |
| 78                  | 0.16   | 0.860               | 1.271    | 0.655           | 0.602    | 0.804           | 0.353    |

APR-246+Panob, double treatment with APR-246 and panobinostat for 72 h; PREAPR-246+Panob48H, pretreatment of APR-246 for 24 h followed by post-treatment with panobinostat for 48 h; PREPanob+APR-24648H, pretreatment of panobinostat for 24 h followed by post-treatment with APR-246 for 48 h; CI, Combinational Index; Panob, panobinostat; Fa, fractions affected.

Table SV. CI values obtained from the different combinations of treatments with APR-246 and temozolomide.

| A, GOS-3 cells     |       |                     |          |                 |          |                 |          |
|--------------------|-------|---------------------|----------|-----------------|----------|-----------------|----------|
| Dose, mM           |       | Combined treatments |          | Pretreatments   |          |                 |          |
|                    |       | APR+Temoz           |          | PREAPR+Temoz48H |          | PRETemoz+APR48H |          |
| APR-246            | Temoz | Fa                  | CI value | Fa              | CI value | Fa              | CI value |
| 62                 | 12.5  | 0.829               | 1.063    | 0.818           | 0.944    | 0.758           | 1.165    |
| 66                 | 25.0  | 0.836               | 1.109    | 0.818           | 1.005    | 0.833           | 1.008    |
| 70                 | 50.0  | 0.863               | 1.086    | 0.853           | 0.985    | 0.846           | 1.025    |
| 74                 | 100.0 | 0.896               | 1.019    | 0.881           | 0.967    | 0.850           | 1.068    |
| 78                 | 200.0 | 0.911               | 1.003    | 0.886           | 0.529    | 0.860           | 1.087    |
| B, MOG-G-CCM cells |       |                     |          |                 |          |                 |          |
| Dose, mM           |       | Combined treatments |          | Pretreatments   |          |                 |          |
|                    |       | APR+Temoz           |          | PREAPR+Temoz48H |          | PRETemoz+APR48H |          |
| APR-246            | Temoz | Fa                  | CI value | Fa              | CI value | Fa              | CI value |
| 33                 | 12.5  | 0.354               | 1.002    | 0.009           | 17.506   | 0.033           | 4.083    |
| 35                 | 25.0  | 0.389               | 1.061    | 0.057           | 3.050    | 0.159           | 1.321    |
| 37                 | 50.0  | 0.412               | 1.134    | 0.135           | 1.783    | 0.177           | 1.485    |
| 39                 | 100.0 | 0.814               | 1.006    | 0.167           | 1.904    | 0.206           | 1.648    |
| 41                 | 200.0 | 0.895               | 1.007    | 0.276           | 1.453    | 0.240           | 1.851    |
| C, U87MG cells     |       |                     |          |                 |          |                 |          |
| Dose, mM           |       | Combined treatments |          | Pretreatments   |          |                 |          |

|                     |       | APR+Temoz           |          | PREAPR+Temoz48H |          | PRETemoz+APR48H |          |
|---------------------|-------|---------------------|----------|-----------------|----------|-----------------|----------|
| APR-246             | Temoz | Fa                  | CI value | Fa              | CI value | Fa              | CI value |
| 33                  | 12.5  | 0.281               | 1.310    | 0.366           | 0.899    | 0.019           | 26.222   |
| 35                  | 25.0  | 0.317               | 1.283    | 0.375           | 0.949    | 0.054           | 7.721    |
| 37                  | 50.0  | 0.344               | 1.329    | 0.470           | 0.944    | 0.080           | 7.262    |
| 39                  | 100.0 | 0.387               | 1.300    | 0.592           | 0.929    | 0.085           | 12.055   |
| 33                  | 200.0 | 0.281               | 1.310    | 0.366           | 0.899    | 0.019           | 26.222   |
| D, LN405 cells      |       |                     |          |                 |          |                 |          |
| Dose, mM            |       | Combined treatments |          | Pretreatments   |          |                 |          |
|                     |       | APR+Temoz           |          | PREAPR+Temoz48H |          | PRETemoz+APR48H |          |
| APR-246             | Temoz | Fa                  | CI value | Fa              | CI value | Fa              | CI value |
| 70                  | 12.5  | 0.687               | 0.914    | 0.127           | 1.217    | 0.288           | 1.004    |
| 74                  | 25.0  | 0.703               | 0.953    | 0.176           | 1.189    | 0.322           | 1.015    |
| 78                  | 50.0  | 0.719               | 0.990    | 0.232           | 1.188    | 0.378           | 0.991    |
| 82                  | 100.0 | 0.804               | 0.947    | 0.315           | 1.139    | 0.446           | 0.952    |
| 86                  | 200.0 | 0.814               | 0.981    | 0.408           | 1.106    | 0.456           | 1.003    |
| E, LN405-TMZR cells |       |                     |          |                 |          |                 |          |
| Dose, mM            |       | Combined treatments |          | Pretreatments   |          |                 |          |
|                     |       | APR+Temoz           |          | PREAPR+Temoz48H |          | PRETemoz+APR48H |          |
| APR-246             | Temoz | Fa                  | CI value | Fa              | CI value | Fa              | CI value |



|    |       |       |       |       |       |       |       |
|----|-------|-------|-------|-------|-------|-------|-------|
| 62 | 12.5  | 0.548 | 1.063 | 0.259 | 1.237 | 0.199 | 1.846 |
| 66 | 25.0  | 0.686 | 1.053 | 0.266 | 1.544 | 0.210 | 2.296 |
| 70 | 50.0  | 0.701 | 1.107 | 0.352 | 0.960 | 0.255 | 1.892 |
| 74 | 100.0 | 0.704 | 1.169 | 0.384 | 0.954 | 0.206 | 6.467 |
| 78 | 200.0 | 0.745 | 1.200 | 0.439 | 0.510 | 0.334 | 1.716 |

APR-246+Temoz, double simultaneous treatment of APR-246 and temozolomide for 72 h; PREAPR-246+Temoz48H, pretreatment of APR-246 for 24 h followed by post-treatment with temozolomide for 48 h; PRETemoz+APR-24648H, pretreatment of temozolomide for 24 h followed by post-treatment with APR-246 for 48 h; CI: Combinational Index; Temoz, temozolomide; Fa, fractions affected.

Table SVI. CI values obtained from APR-246, panobinostat and temozolomide triple combination.

| A, GOS-3 cells     |        |        |                 |          |
|--------------------|--------|--------|-----------------|----------|
| Dose, mM           |        |        | Experimental CI |          |
| APR-246            | Panob  | Temoz  | Fa              | CI value |
| 20.666             | 3.333  | 4.166  | 0.830           | 0.354    |
| 22.000             | 6.667  | 8.333  | 0.840           | 0.366    |
| 23.333             | 13.333 | 16.666 | 0.872           | 0.351    |
| 24.666             | 26.667 | 33.333 | 0.879           | 0.362    |
| 26.000             | 53.333 | 66.666 | 0.924           | 0.314    |
| B, MOG-G-CCM cells |        |        |                 |          |
| Dose, mM           |        |        | Experimental CI |          |
| APR-246            | Panob  | Temoz  | Fa              | CI value |
| 11.000             | 3.333  | 4.166  | 0.277           | 0.469    |
| 11.666             | 6.667  | 8.333  | 0.315           | 0.583    |
| 12.333             | 13.333 | 16.666 | 0.778           | 0.423    |
| 13.000             | 26.667 | 33.333 | 0.815           | 0.506    |
| 13.666             | 53.333 | 66.666 | 0.828           | 0.671    |
| C, U87MG cells     |        |        |                 |          |
| Dose, mM           |        |        | Experimental CI |          |
| APR-246            | Panob  | Temoz  | Fa              | CI value |
| 11.000             | 3.333  | 4.166  | 0.822           | 0.251    |
| 11.666             | 6.667  | 8.333  | 0.839           | 0.317    |
| 12.333             | 13.333 | 16.666 | 0.877           | 0.270    |

|                     |        |        |                 |          |
|---------------------|--------|--------|-----------------|----------|
| 13.000              | 26.667 | 33.333 | 0.916           | 0.268    |
| 13.666              | 53.333 | 66.666 | 0.946           | 0.265    |
| D, LN405 cells      |        |        |                 |          |
| Dose, mM            |        |        | Experimental CI |          |
| APR-246             | Panob  | Temoz  | Fa              | CI value |
| 23.333              | 3.333  | 4.166  | 0.822           | 0.251    |
| 24.666              | 6.667  | 8.333  | 0.839           | 0.316    |
| 26.000              | 13.333 | 16.666 | 0.877           | 0.270    |
| 27.333              | 26.667 | 33.333 | 0.916           | 0.268    |
| 28.666              | 53.333 | 66.666 | 0.946           | 0.265    |
| E, LN405-TMZR cells |        |        |                 |          |
| Dose, mM            |        |        | Experimental CI |          |
| APR-246             | Panob  | Temoz  | Fa              | CI value |
| 20.666              | 3.333  | 4.166  | 0.262           | 0.668    |
| 22.000              | 6.667  | 8.333  | 0.298           | 0.666    |
| 23.333              | 13.333 | 16.666 | 0.386           | 0.611    |
| 24.666              | 26.667 | 33.333 | 0.717           | 0.460    |
| 26.000              | 53.333 | 66.666 | 0.856           | 0.427    |

CI, Combinational Index; Panob, Panobinostat; Temoz, temozolomide; Fa, fractions affected.

Table SVII. CI values obtained from APR-246, DZ-Nep and panobinostat triple combination.

| A, GOS-3 cells     |        |        |                 |          |
|--------------------|--------|--------|-----------------|----------|
| Dose, mM           |        |        | Experimental CI |          |
| APR-246            | DZ-Nep | Panob  | Fa              | CI value |
| 20.666             | 1.666  | 3.333  | 0.869           | 0.314    |
| 22.000             | 3.333  | 6.667  | 0.872           | 0.331    |
| 23.333             | 6.666  | 13.333 | 0.877           | 0.345    |
| 24.666             | 13.333 | 26.667 | 0.893           | 0.343    |
| 26.000             | 26.666 | 53.333 | 0.898           | 0.355    |
| B, MOG-G-CCM cells |        |        |                 |          |
| Dose, mM           |        |        | Experimental CI |          |
| APR-246            | DZ-Nep | Panob  | Fa              | CI value |
| 11.000             | 1.666  | 3.333  | 0.463           | 0.387    |
| 11.666             | 3.333  | 6.667  | 0.576           | 0.425    |
| 12.333             | 6.666  | 13.333 | 0.855           | 0.379    |
| 13.000             | 13.333 | 26.667 | 0.878           | 0.442    |
| 13.666             | 26.666 | 53.333 | 0.913           | 0.513    |
| C, U87MG cells     |        |        |                 |          |
| Dose, mM           |        |        | Experimental CI |          |
| APR-246            | DZ-Nep | Panob  | Fa              | CI value |
| 11.000             | 1.666  | 3.333  | 0.822           | 0.251    |
| 11.666             | 3.333  | 6.667  | 0.839           | 0.316    |
| 12.333             | 6.666  | 13.333 | 0.877           | 0.270    |

|                     |        |        |                 |          |
|---------------------|--------|--------|-----------------|----------|
| 13.000              | 13.333 | 26.667 | 0.916           | 0.268    |
| 13.666              | 26.666 | 53.333 | 0.946           | 0.265    |
| D, LN405 cells      |        |        |                 |          |
| Dose, mM            |        |        | Experimental CI |          |
| APR-246             | DZ-Nep | Panob  | Fa              | CI value |
| 23.333              | 1.666  | 3.333  | 0.446           | 0.216    |
| 24.666              | 3.333  | 6.667  | 0.509           | 0.249    |
| 26.000              | 6.666  | 13.333 | 0.747           | 0.247    |
| 27.333              | 13.333 | 26.667 | 0.830           | 0.301    |
| 28.666              | 26.666 | 53.333 | 0.835           | 0.460    |
| E, LN405-TMZR cells |        |        |                 |          |
| Dose, mM            |        |        | Experimental CI |          |
| APR-246             | DZ-Nep | Panob  | Fa              | CI value |
| 20.666              | 1.666  | 3.333  | 0.207           | 0.829    |
| 22.000              | 3.333  | 6.667  | 0.249           | 0.964    |
| 23.333              | 6.666  | 13.333 | 0.480           | 0.600    |
| 24.666              | 13.333 | 26.667 | 0.810           | 0.412    |
| 26.000              | 26.666 | 53.333 | 0.879           | 0.411    |

CI, Combinational Index; Panob, panobinostat; Fa, fractions affected.

Table SVIII. CI values obtained from APR-246, DZ-Nep and temozolomide triple combination.

| A, GOS-3 cells     |        |        |                 |          |
|--------------------|--------|--------|-----------------|----------|
| Dose mM            |        |        | Experimental CI |          |
| APR-246            | DZ-Nep | Temoz  | Fa              | CI value |
| 20.666             | 1.666  | 4.166  | 0.833           | 0.351    |
| 22.000             | 3.333  | 8.333  | 0.840           | 0.366    |
| 23.333             | 6.666  | 16.666 | 0.853           | 0.374    |
| 24.666             | 13.333 | 33.333 | 0.866           | 0.37426  |
| 26.000             | 26.666 | 66.666 | 0.877           | 0.386    |
| B, MOG-G-CCM cells |        |        |                 |          |
| Dose, mM           |        |        | Experimental CI |          |
| APR-246            | DZ-Nep | Temoz  | Fa              | CI value |
| 11.000             | 1.666  | 4.166  | 0.229           | 0.375    |
| 11.666             | 3.333  | 8.333  | 0.251           | 0.412    |
| 12.333             | 6.666  | 16.666 | 0.298           | 0.442    |
| 13.000             | 13.333 | 33.333 | 0.329           | 0.494    |
| 13.666             | 26.666 | 66.666 | 0.340           | 0.598    |
| C, U87MG cells     |        |        |                 |          |
| Dose, mM           |        |        | Experimental CI |          |
| APR-246            | DZ-Nep | Temoz  | Fa              | CI value |
| 11.000             | 1.666  | 4.166  | 0.489           | 0.312    |
| 11.666             | 3.333  | 8.333  | 0.503           | 0.336    |
| 12.333             | 6.666  | 16.666 | 0.622           | 0.332    |

|                     |        |        |                 |          |
|---------------------|--------|--------|-----------------|----------|
| 13.000              | 13.333 | 33.333 | 0.797           | 0.306    |
| 13.666              | 26.666 | 66.666 | 0.812           | 0.323    |
| D, LN405 cells      |        |        |                 |          |
| Dose, mM            |        |        | Experimental CI |          |
| APR-246             | DZ-Nep | Temoz  | Fa              | CI value |
| 23.333              | 1.666  | 4.166  | 0.476           | 0.174    |
| 24.666              | 3.333  | 8.333  | 0.495           | 0.183    |
| 26.000              | 6.666  | 16.666 | 0.561           | 0.184    |
| 27.333              | 13.333 | 33.333 | 0.668           | 0.176    |
| 28.666              | 26.666 | 66.666 | 0.794           | 0.161    |
| E, LN405-TMZR cells |        |        |                 |          |
| Dose, mM            |        |        | Experimental CI |          |
| APR-246             | DZ-Nep | Temoz  | Fa              | CI value |
| 20.666              | 1.666  | 4.166  | 0.353           | 0.467    |
| 22.000              | 3.333  | 8.333  | 0.358           | 0.559    |
| 23.333              | 6.666  | 16.666 | 0.382           | 0.652    |
| 24.666              | 13.333 | 33.333 | 0.404           | 0.792    |
| 26.000              | 26.666 | 66.666 | 0.530           | 0.665    |

CI, Combinational Index; Temoz, temozolomide; Fa, fractions affected.
